# Supplementary material for: Serial interactome capture of the human cell nucleus
Source: PubMed Central journal article supplement (PMC4822031; doi:10.1038/ncomms11212), 2016-04-04
Supplement: ncomms11212-s1.pdf [file ncomms11212-s1.pdf]

# Supplementary Figure 1

**a**

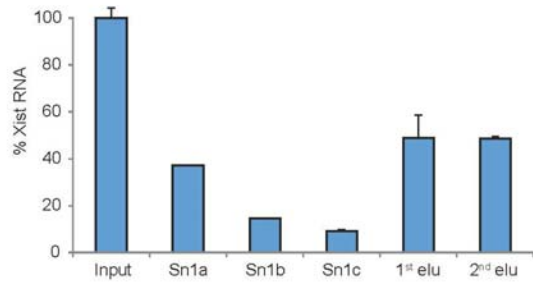

**b**

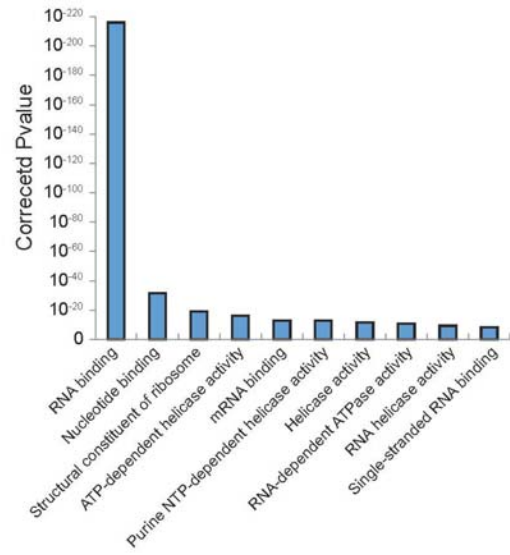

**c**

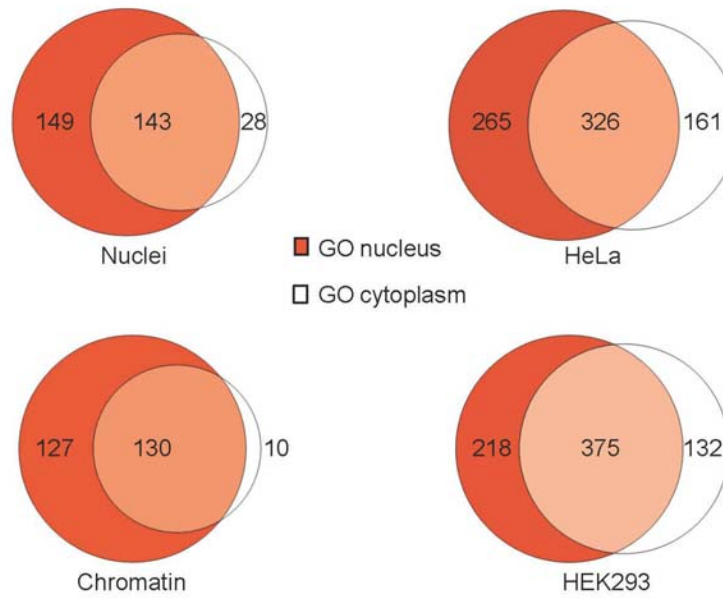

**d**

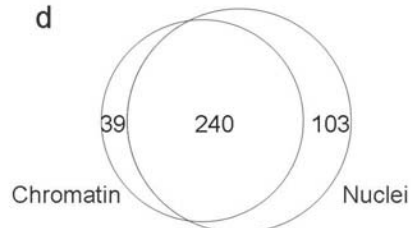

**Supplementary Figure 1: GO analysis for proteins identified in serIC.**

(a) pPCR analysis of Xist RNA in K562 nuclear extract (Input), supernatants (Sn1a to Sn1c) and pooled eluate from the first round of purification (1<sup>st</sup> elu); and the pooled eluate from the second round of purification (2<sup>nd</sup> elu). Levels are normalized to Xist RNA in the Input. Error bars show s.d. (b) Shown are the 10 most highly enriched “Molecular Function” GO terms for all enriched proteins compared to the human genome. (c) Number of proteins with GO annotation “nucleus” or “cytoplasm” in serIC experiments from chromatin or nuclei; and from HeLa and HEK293 IC experiments<sup>18,19</sup>. (d) Overlap between serIC protein identifications from chromatin and nuclear samples.

Supplementary Figure 2

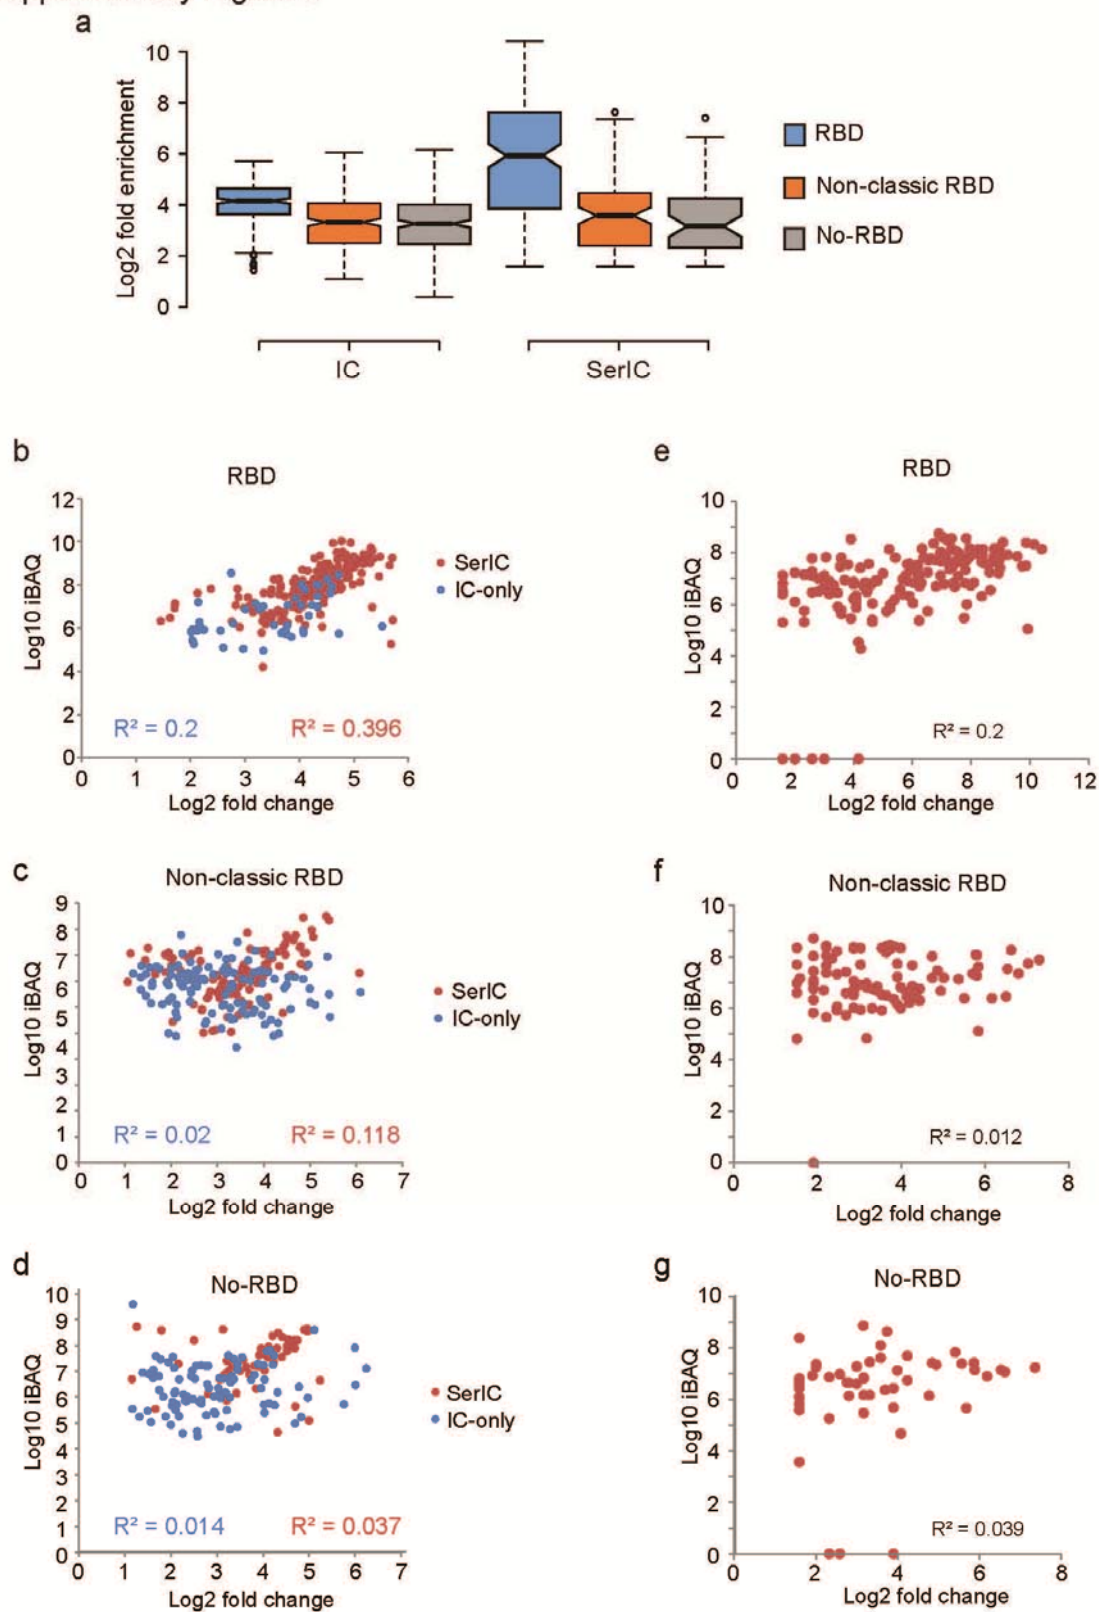

## **Supplementary Figure 2: Comparison of serIC and IC fold enrichments.**

(a) Fold enrichment values from HEK293 IC data <sup>18</sup> and from serIC were grouped by the presence or absence of classical or non-classical RBDs as indicated. (b-d) Shown are protein abundances and fold recoveries of RBPs detected by IC in HEK293 <sup>18</sup> for classic (b), non-classic (c) and no-RBD candidates (d) that are present in K562 nuclei and recovered (red) or not recovered (blue) by serIC. (e-g) Shown are protein abundances and fold recoveries of RBPs detected by serIC in K562 nuclei for classic (e), non-classic (f) and no-RBD proteins (g).

Supplementary Figure 3

a

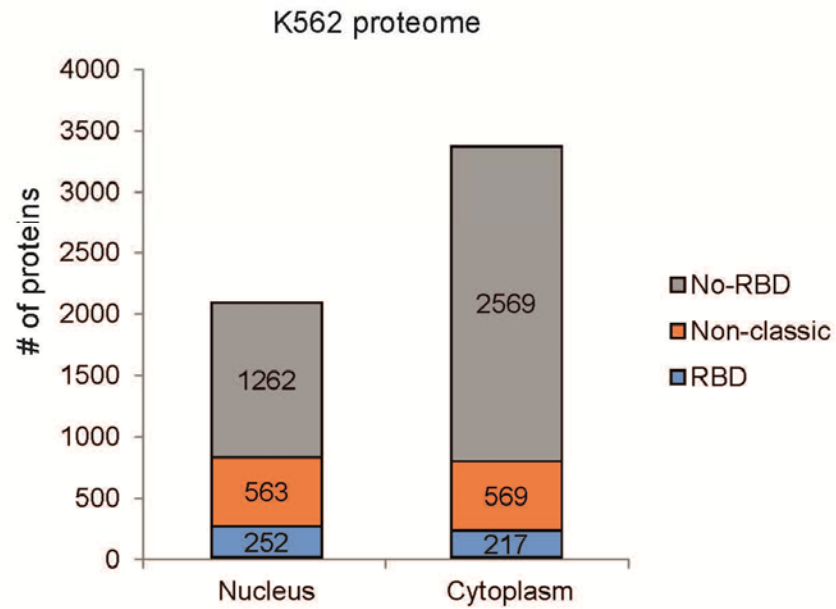

**Supplementary Figure 3: Occurrence of RBDs in the cytoplasm and nucleus of K562 cells.**

(a) Proteins identified in the cytoplasm or nucleus of K562 cells by LC-MS/MS were grouped by the occurrence of classic or non-classic RBDs as indicated.

## Supplementary Figure 4

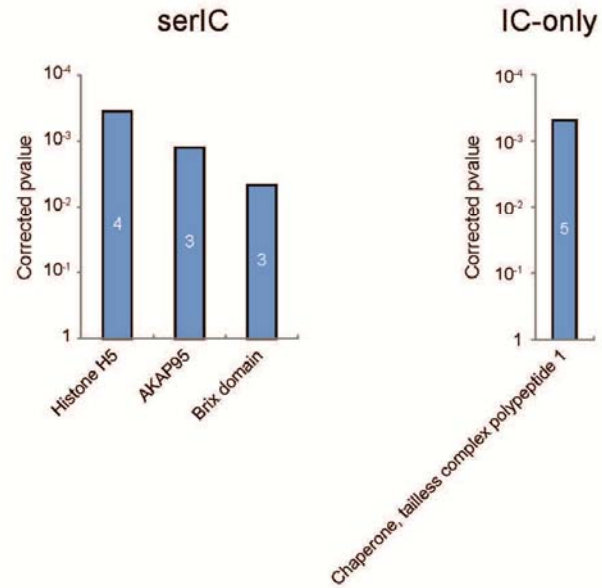

### Supplementary Figure 4: Domains in no-RBD RBPs.

(a-b) Shown are protein domains that are enriched within serIC-derived (a) or IC-only (b) no-RBD proteins with a corrected pvalue below 0.05 (Benjamini-Hochberg).

Supplementary Figure 5

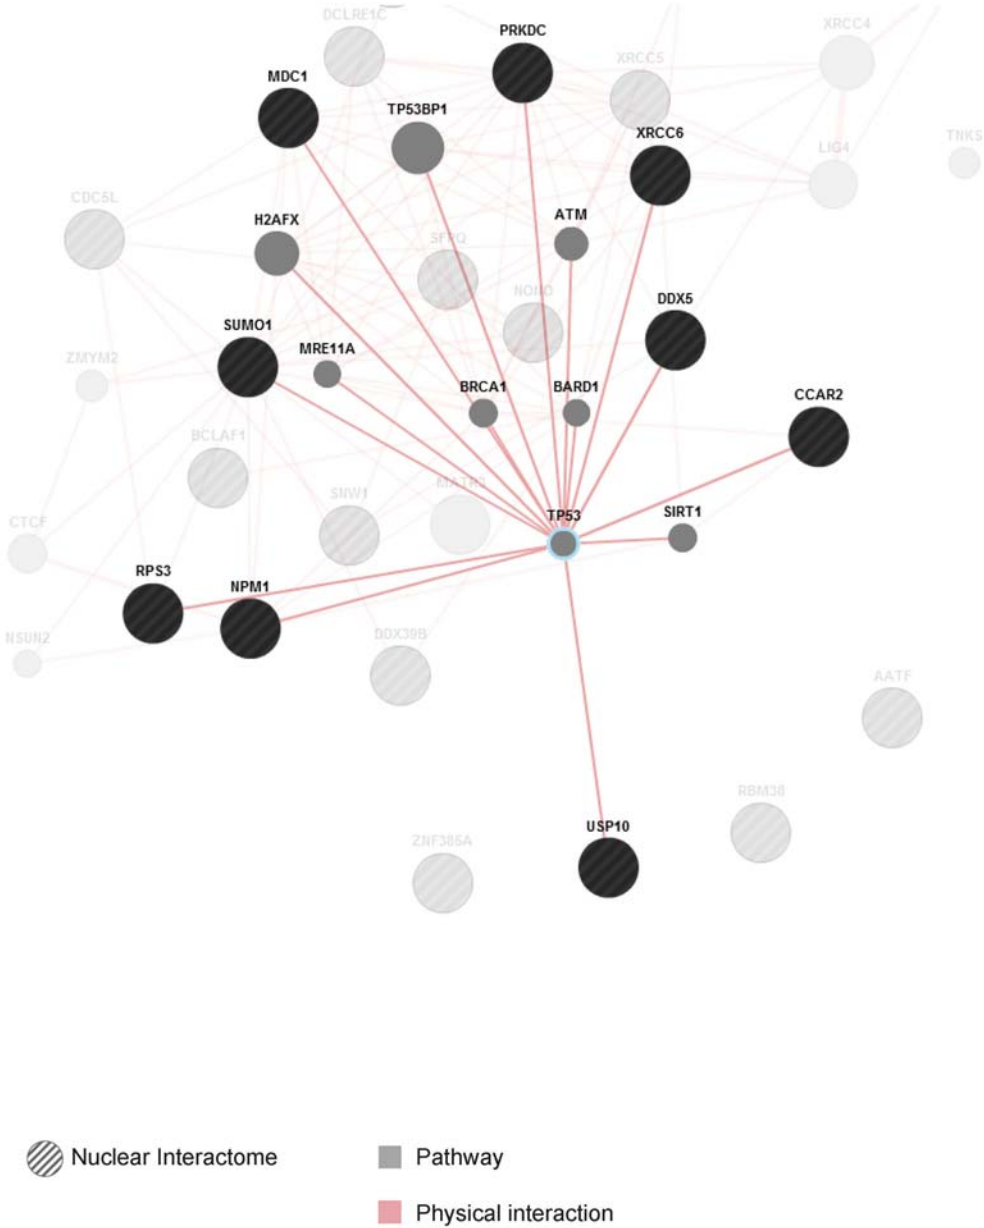

**Supplementary Figure 5: The TP53 interacting nuclear interactome.**

Same network as in Figure 5 with physical binding partners of TP53 highlighted.

## Supplementary Figure 6

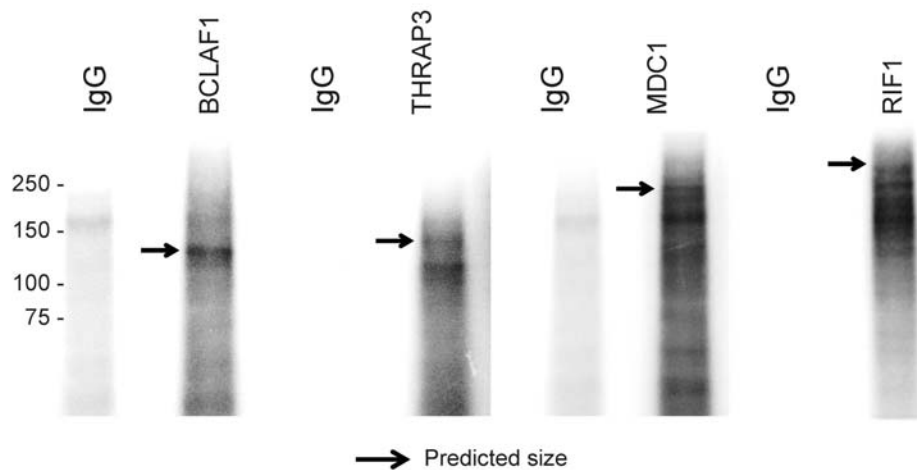

### Supplementary Figure 6: Validation of protein-RNA interaction of novel RBPs.

The indicated endogenous proteins were immunoprecipitated from UV-crosslinked K562 cells using antibodies. Crosslinked RNA was radiolabeled with PNK and  $^{32}\text{P}$ -ATP, and residual DNA was digested after the labelling step with turbo DNase. Protein-RNA complexes were separated by PAGE and crosslinked RNA was visualized by exposure to a phosphoimager screen.

### Supplementary Methods

#### CLIP

Cells were irradiated with UV-C light at 254nm, lysed in RIPA buffer (50mM Tris pH 7.4, 150mM NaCl, 1mM EDTA, 0.5% Igepal, 0.5% DOC, 0.1% SDS) and immunoprecipitated using 2 $\mu\text{g}$  of rabbit anti-BTF/BCLAF1 (Bethyl A300-610); rabbit anti-THRAP3 (Bethyl A300-955A); rabbit anti-MDC1 (Bethyl A300-053A); or rabbit anti-RIF1 (Bethyl A300-567A). Immunocomplexes were washed three times with RIPA-HS (50mM Tris pH 7.4, 600mM NaCl, 1mM EDTA, 0.5% Igepal, 0.5% DOC, 0.1% SDS) and crosslinked RNA was trimmed by RNaseI. Protein-RNA complexes were separated by PAGE and visualized by exposure to a phosphoimager screen.
